# Supplementary material for: Design and synthesis of pyrrolidine-containing sphingomimetics
Source: Royal Society of Chemistry journal article supplement (doi:10.1039/c1ob05324h), 2011-01-01

## *Supporting Information*

# **Design and Synthesis of Pyrrolidine-Containing Sphingomimetics**

**Seokwoo Lee, Sukjin Lee, Hyen Joo Park, Sang Kook Lee, and Sanghee Kim\***

College of Pharmacy, Seoul National University, San 56-1, Shilim, Kwanak, Seoul 151-742, Korea

*pennkim@snu.ac.kr*

## **Contents**

|                                                                          |         |
|--------------------------------------------------------------------------|---------|
| <sup>1</sup> H NMR and <sup>13</sup> C NMR spectra of compound <b>9</b>  | S2-S3   |
| <sup>1</sup> H NMR and <sup>13</sup> C NMR spectra of compound <b>10</b> | S4-S5   |
| <sup>1</sup> H NMR and <sup>13</sup> C NMR spectra of compound <b>11</b> | S6-S7   |
| <sup>1</sup> H NMR and <sup>13</sup> C NMR spectra of compound <b>12</b> | S8-S9   |
| <sup>1</sup> H NMR and <sup>13</sup> C NMR spectra of compound <b>13</b> | S10-S11 |
| <sup>1</sup> H NMR and <sup>13</sup> C NMR spectra of compound <b>14</b> | S12-S13 |
| <sup>1</sup> H NMR and <sup>13</sup> C NMR spectra of compound <b>15</b> | S14-S15 |
| <sup>1</sup> H NMR and <sup>13</sup> C NMR spectra of compound <b>6</b>  | S16-S17 |
| <sup>1</sup> H NMR and <sup>13</sup> C NMR spectra of compound <b>7</b>  | S18-S19 |



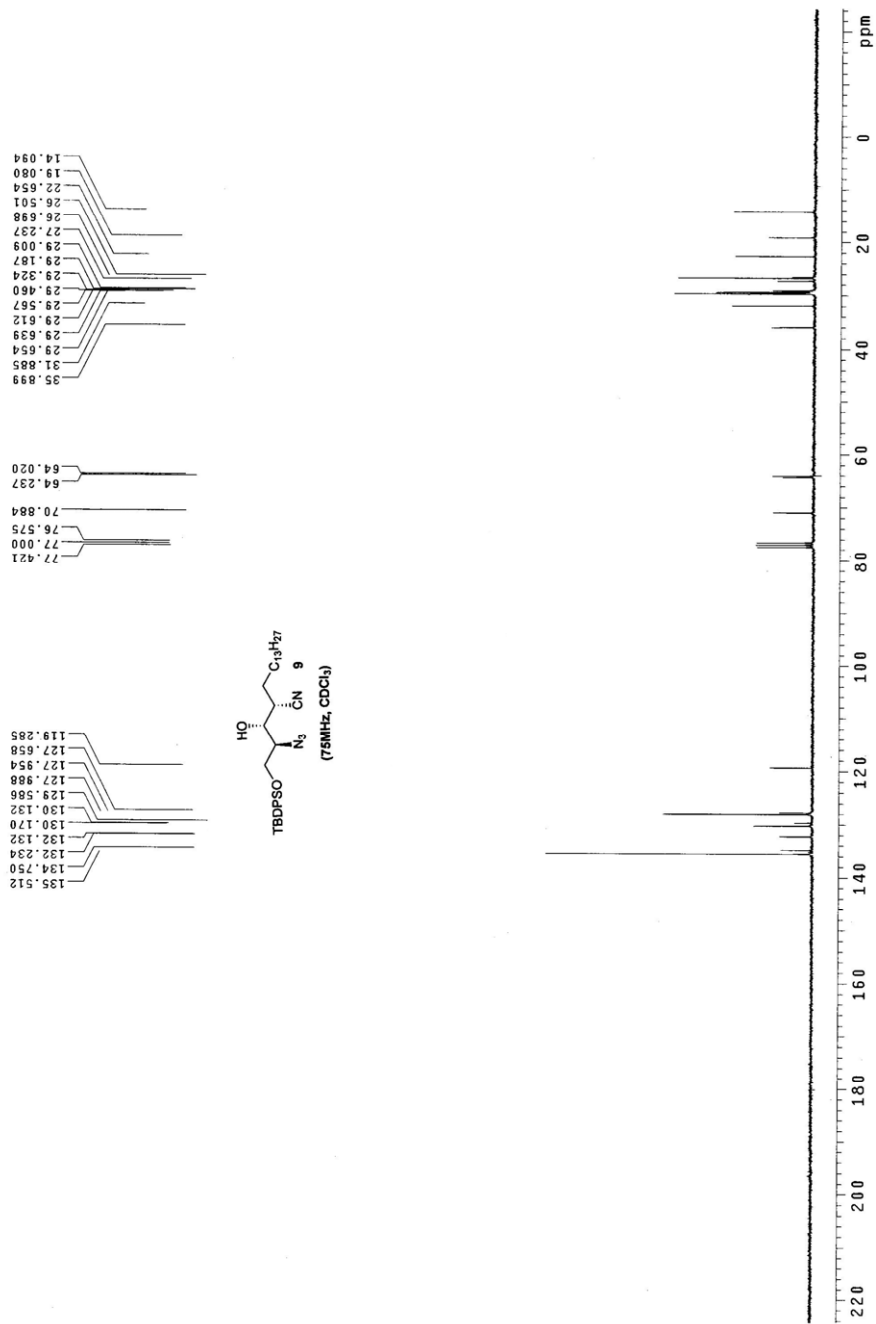

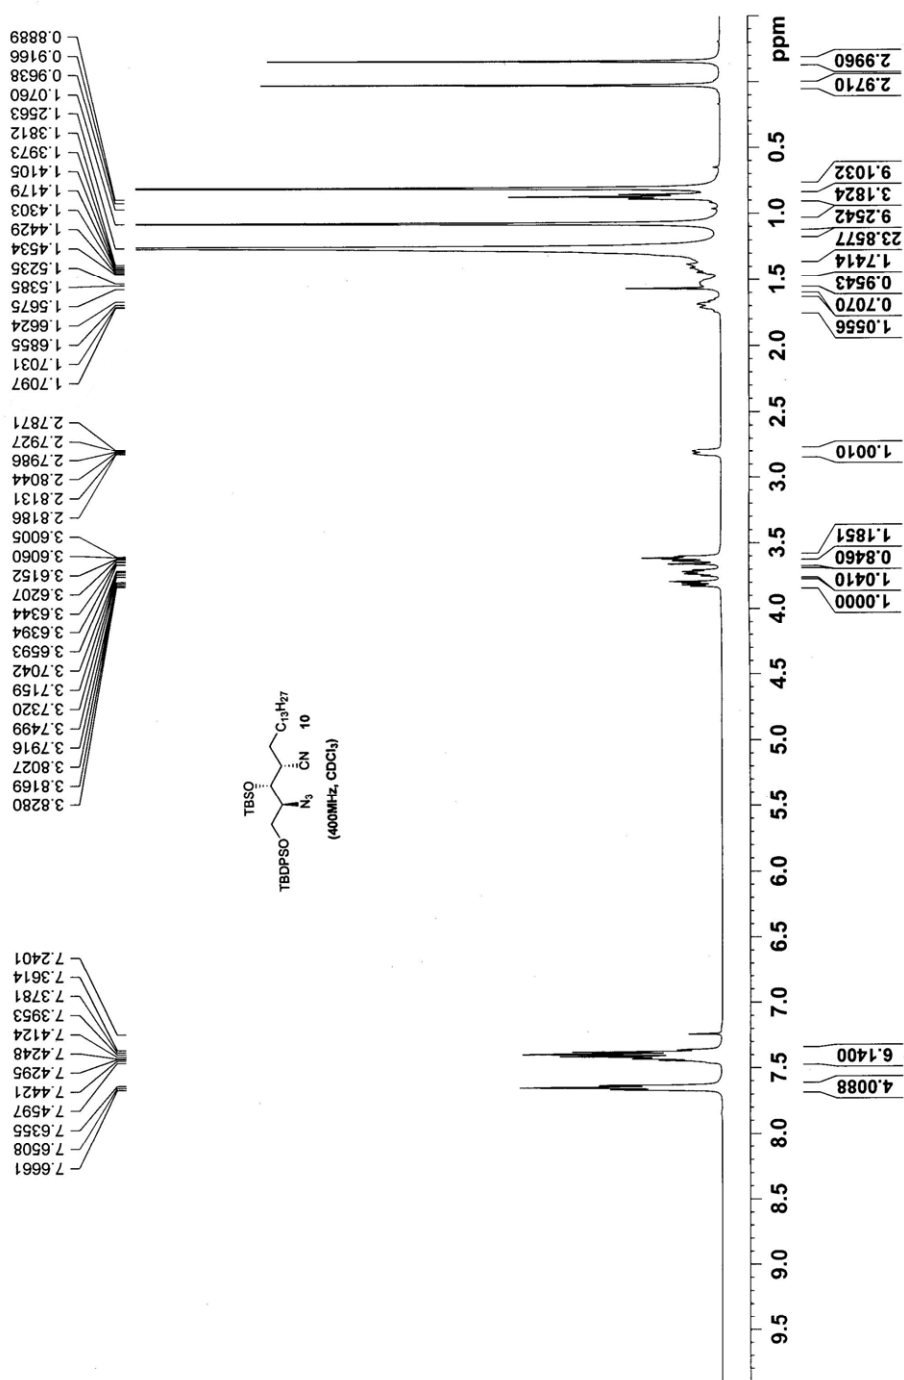



















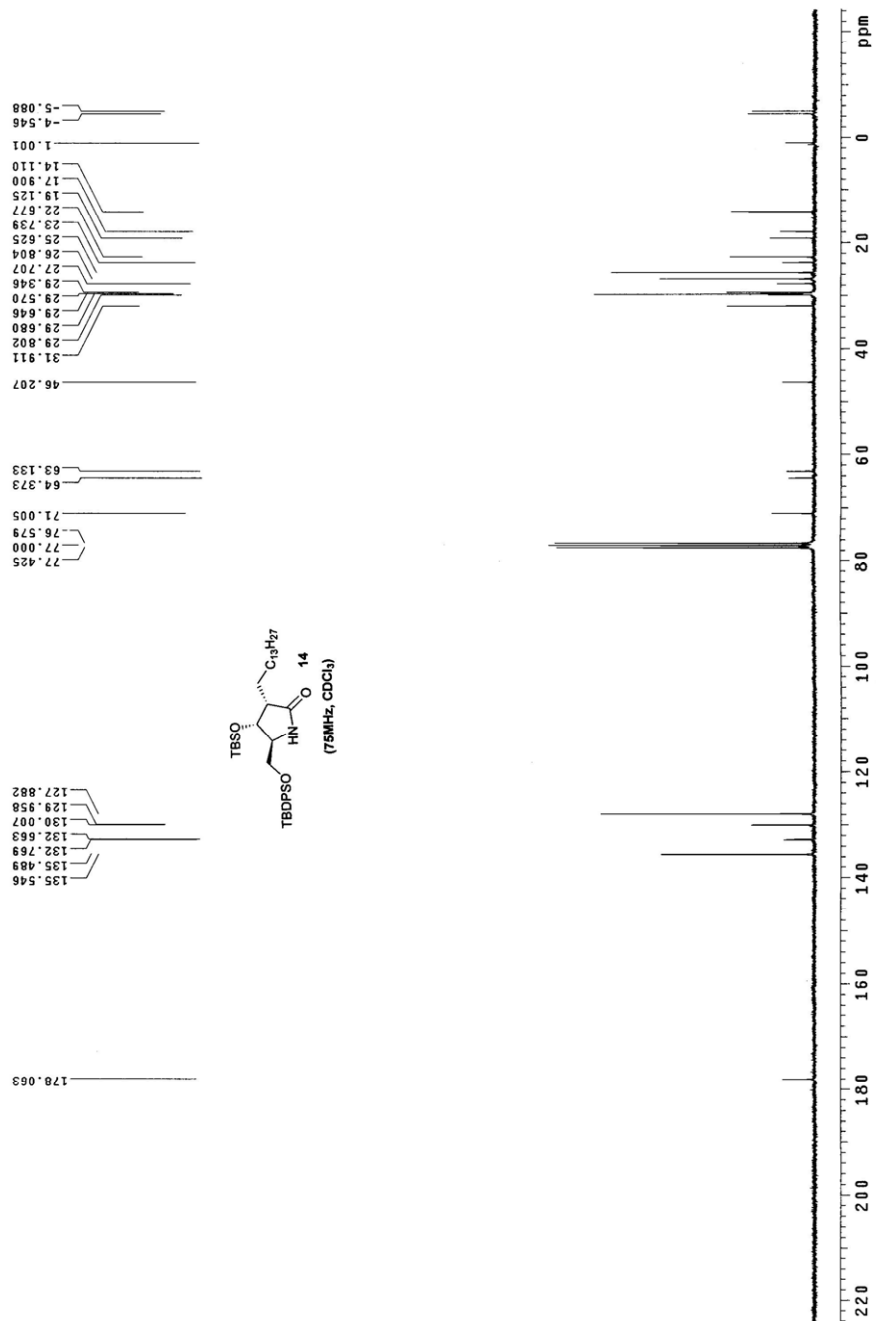

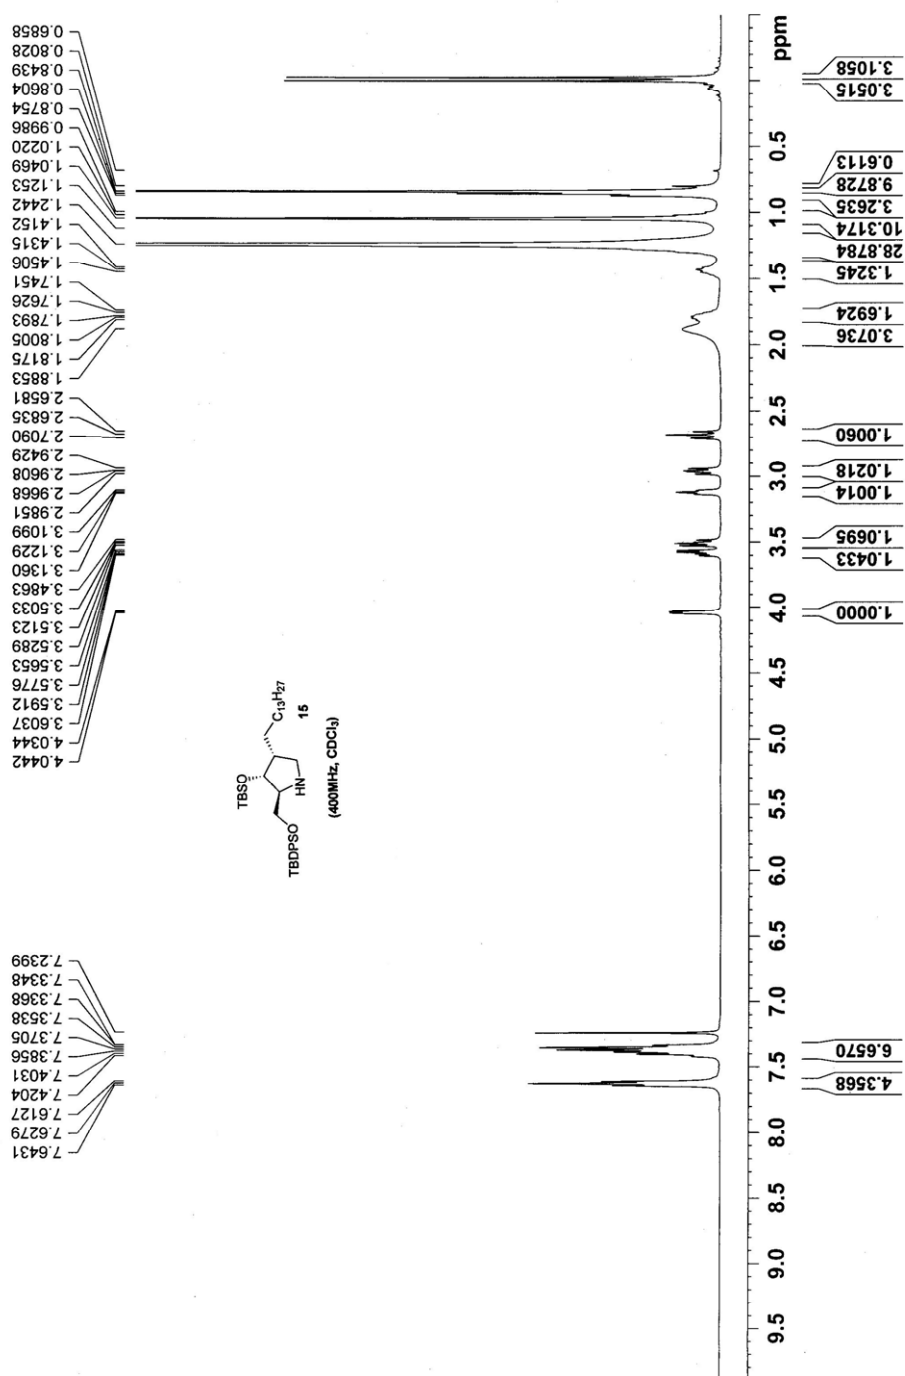







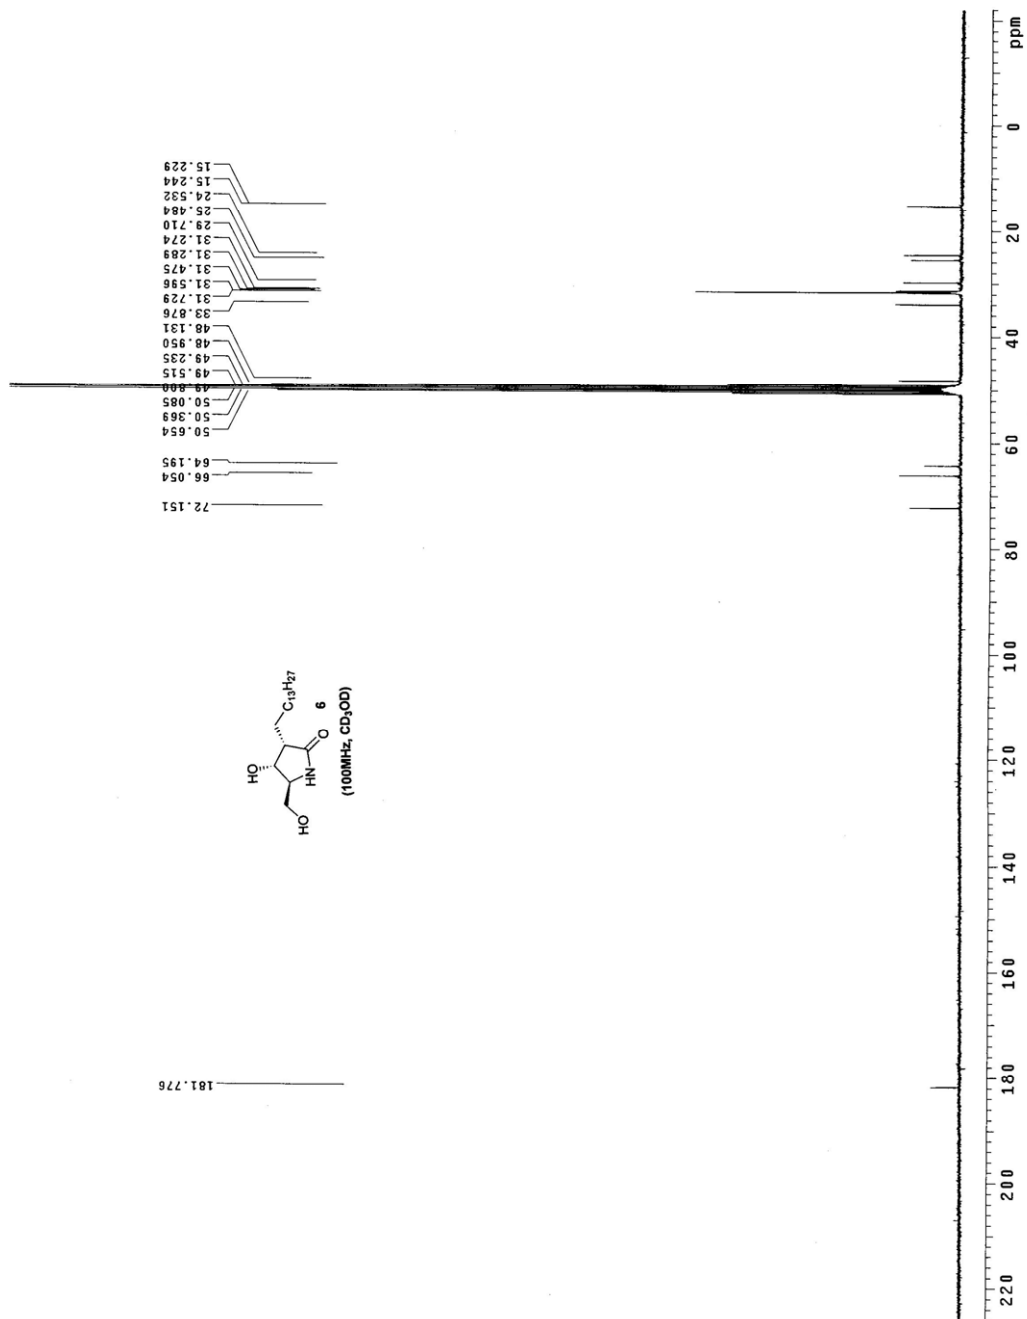

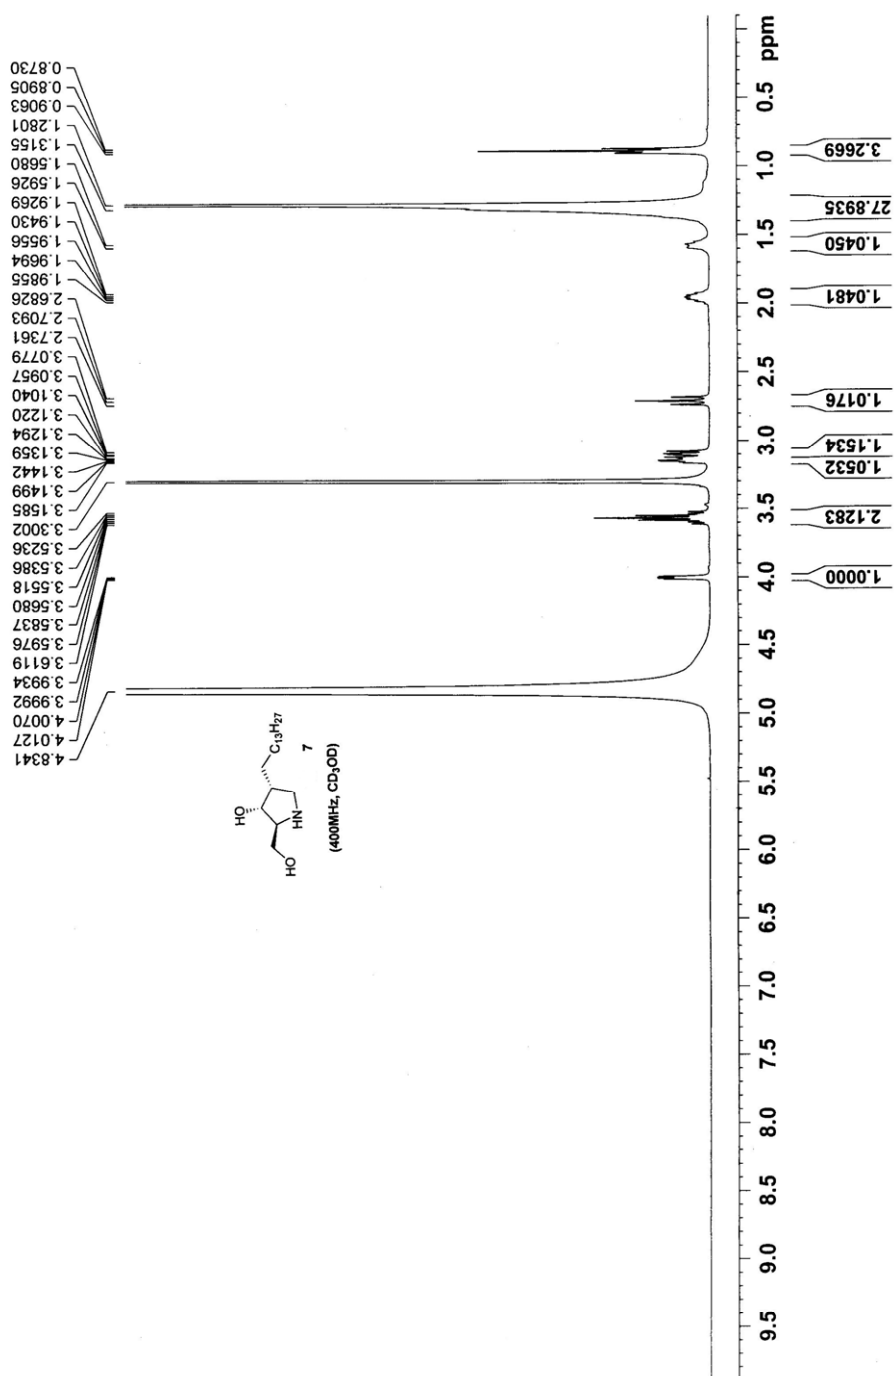

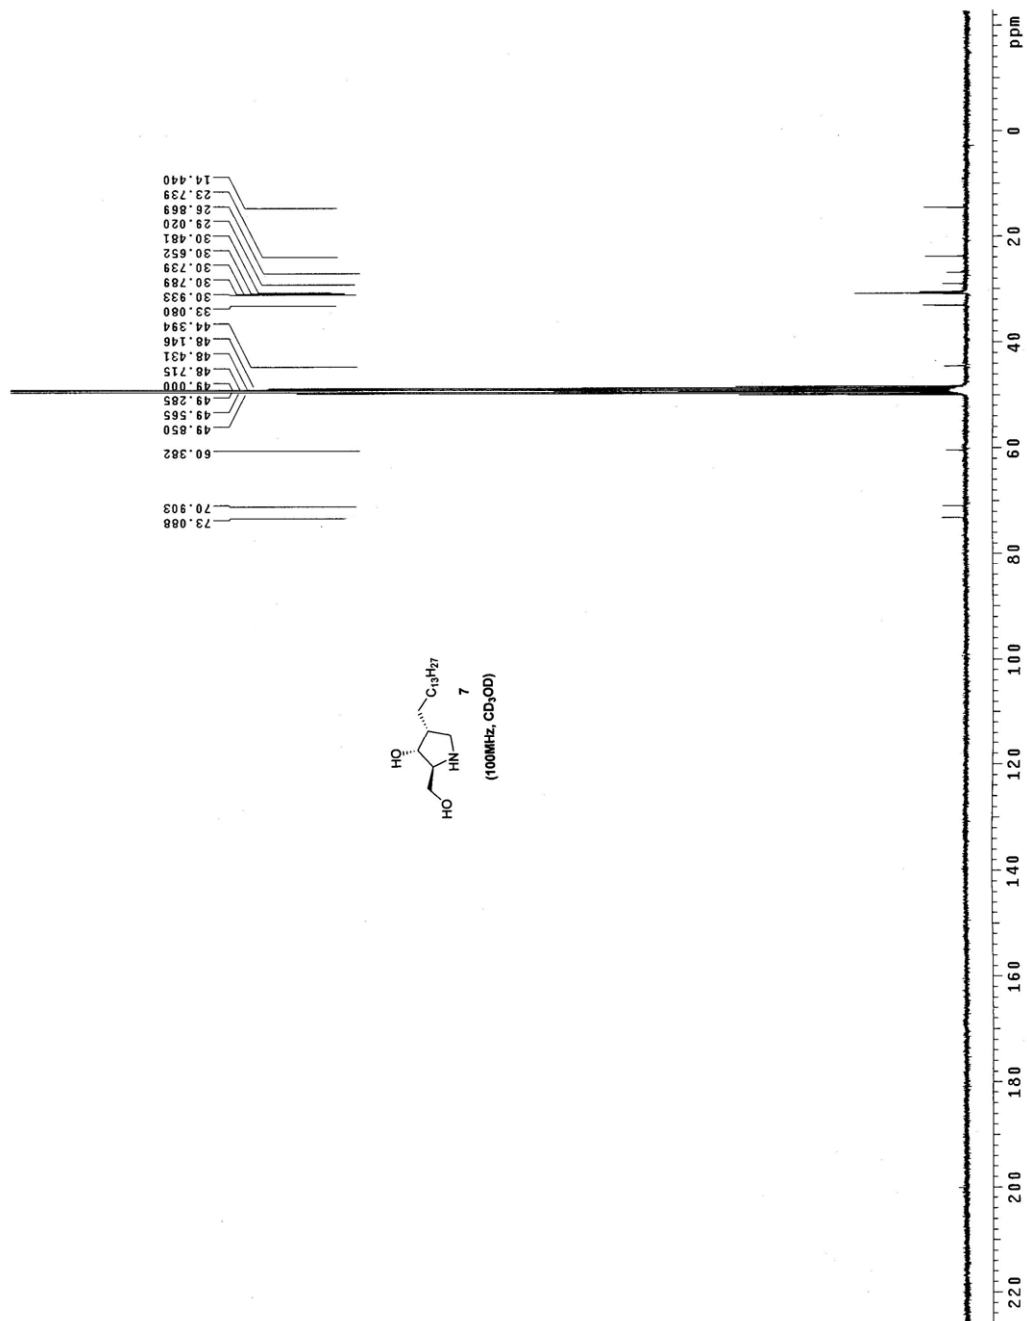

Supplement: c1ob05324h.pdf [file c1ob05324h.pdf]
